# Supplementary material for: Molecular Characterization and Establishment of a Prognostic Model Based on Primary Immunodeficiency Features in Association with RNA Modifications in Triple-Negative Breast Cancer
Source: MDPI journal article supplement (doi:10.3390/genes14122172), 2023-12-02

# Supplementary Figure S1

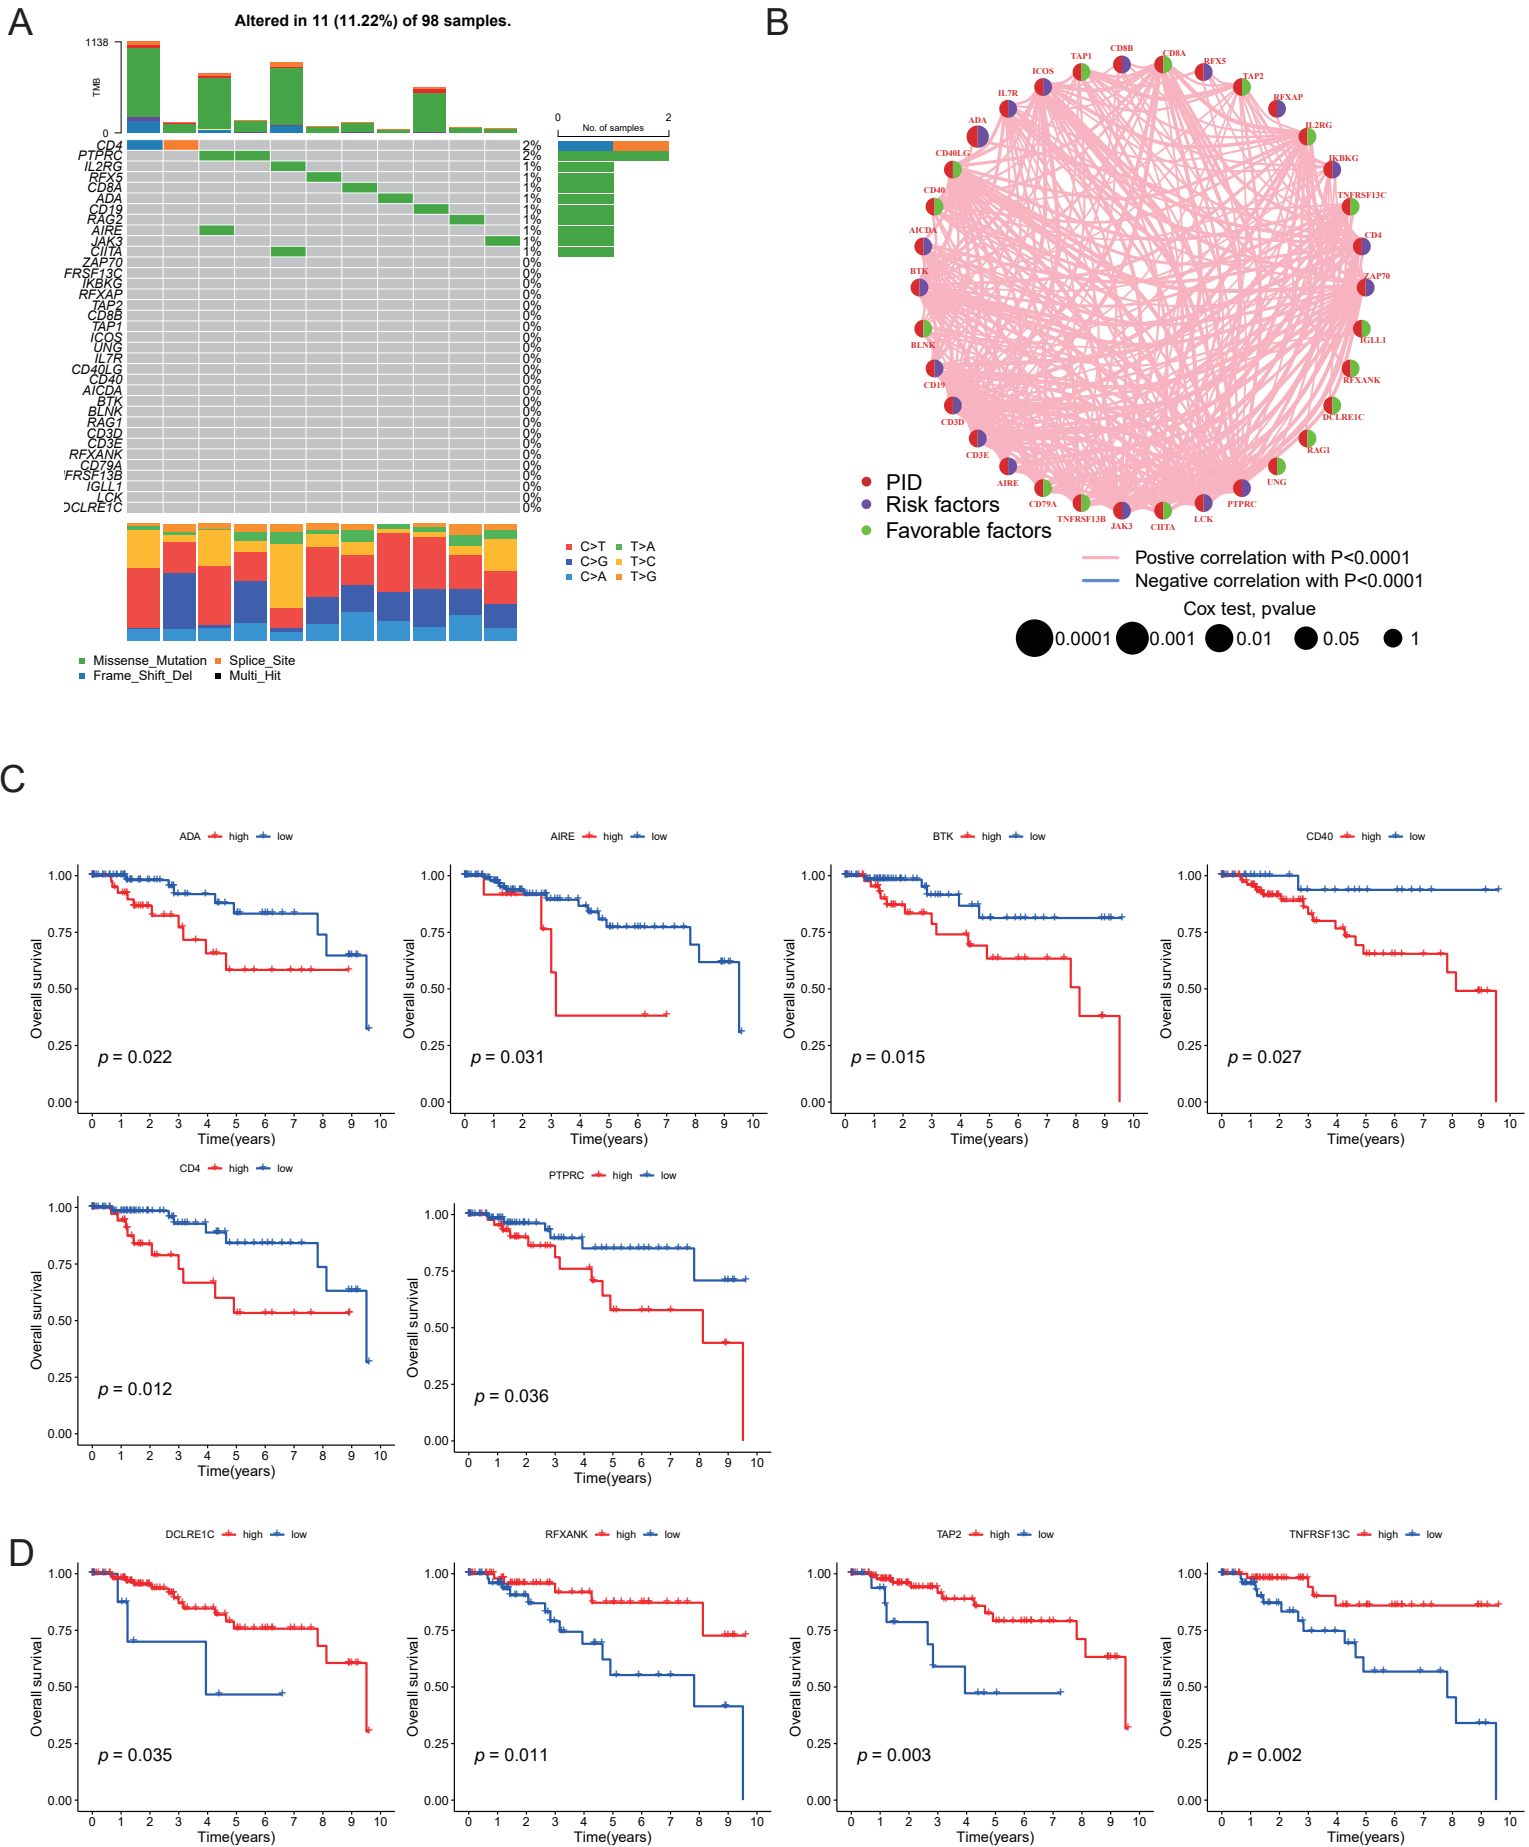

# Supplementary Figure S2

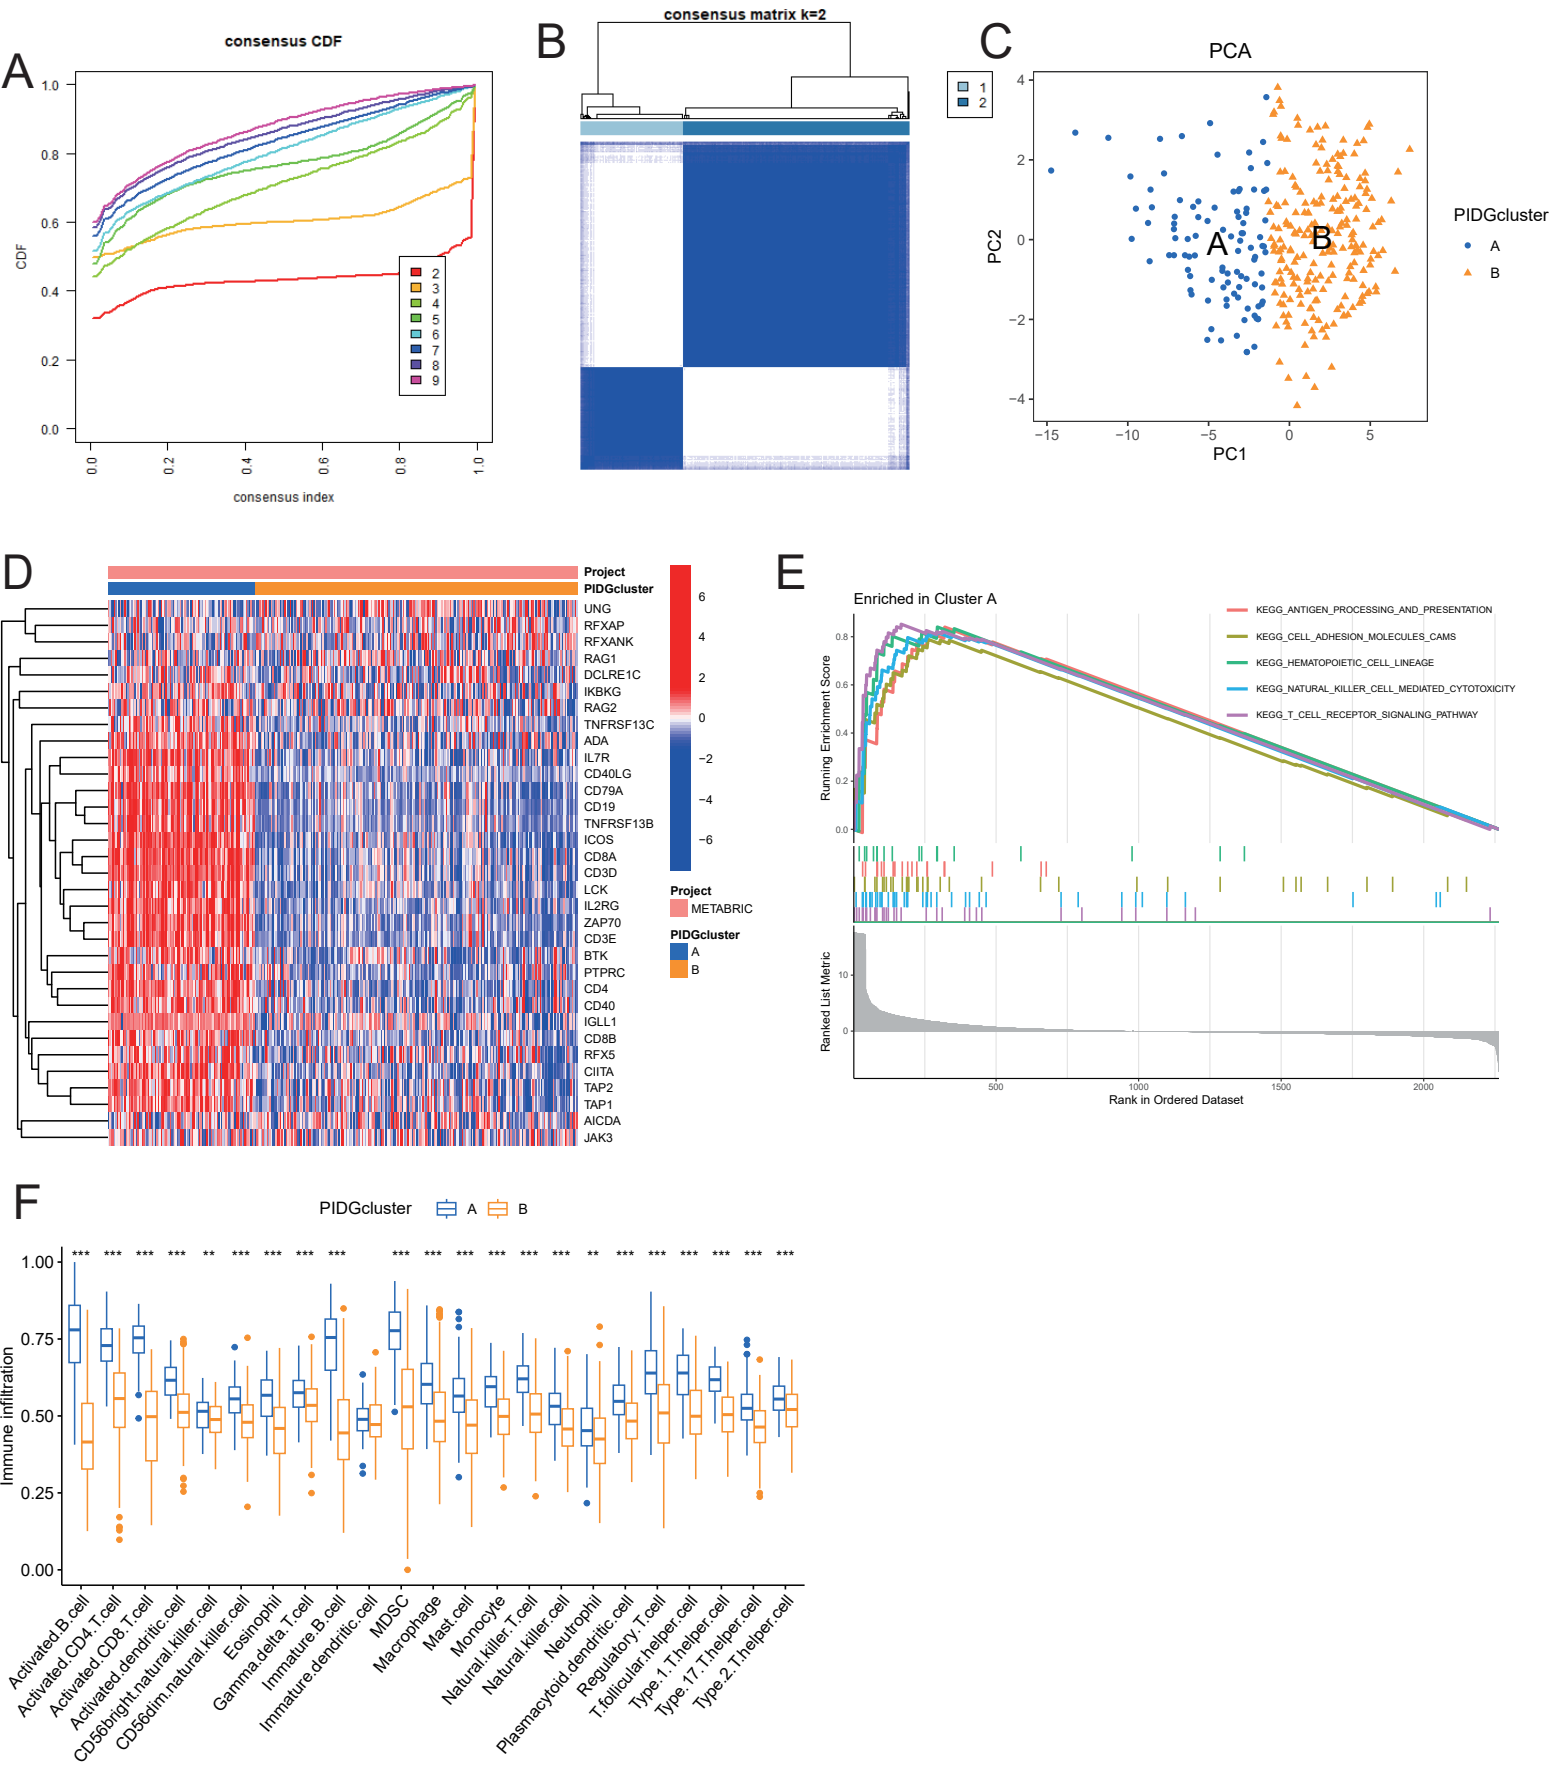

Supplementary Figure S3

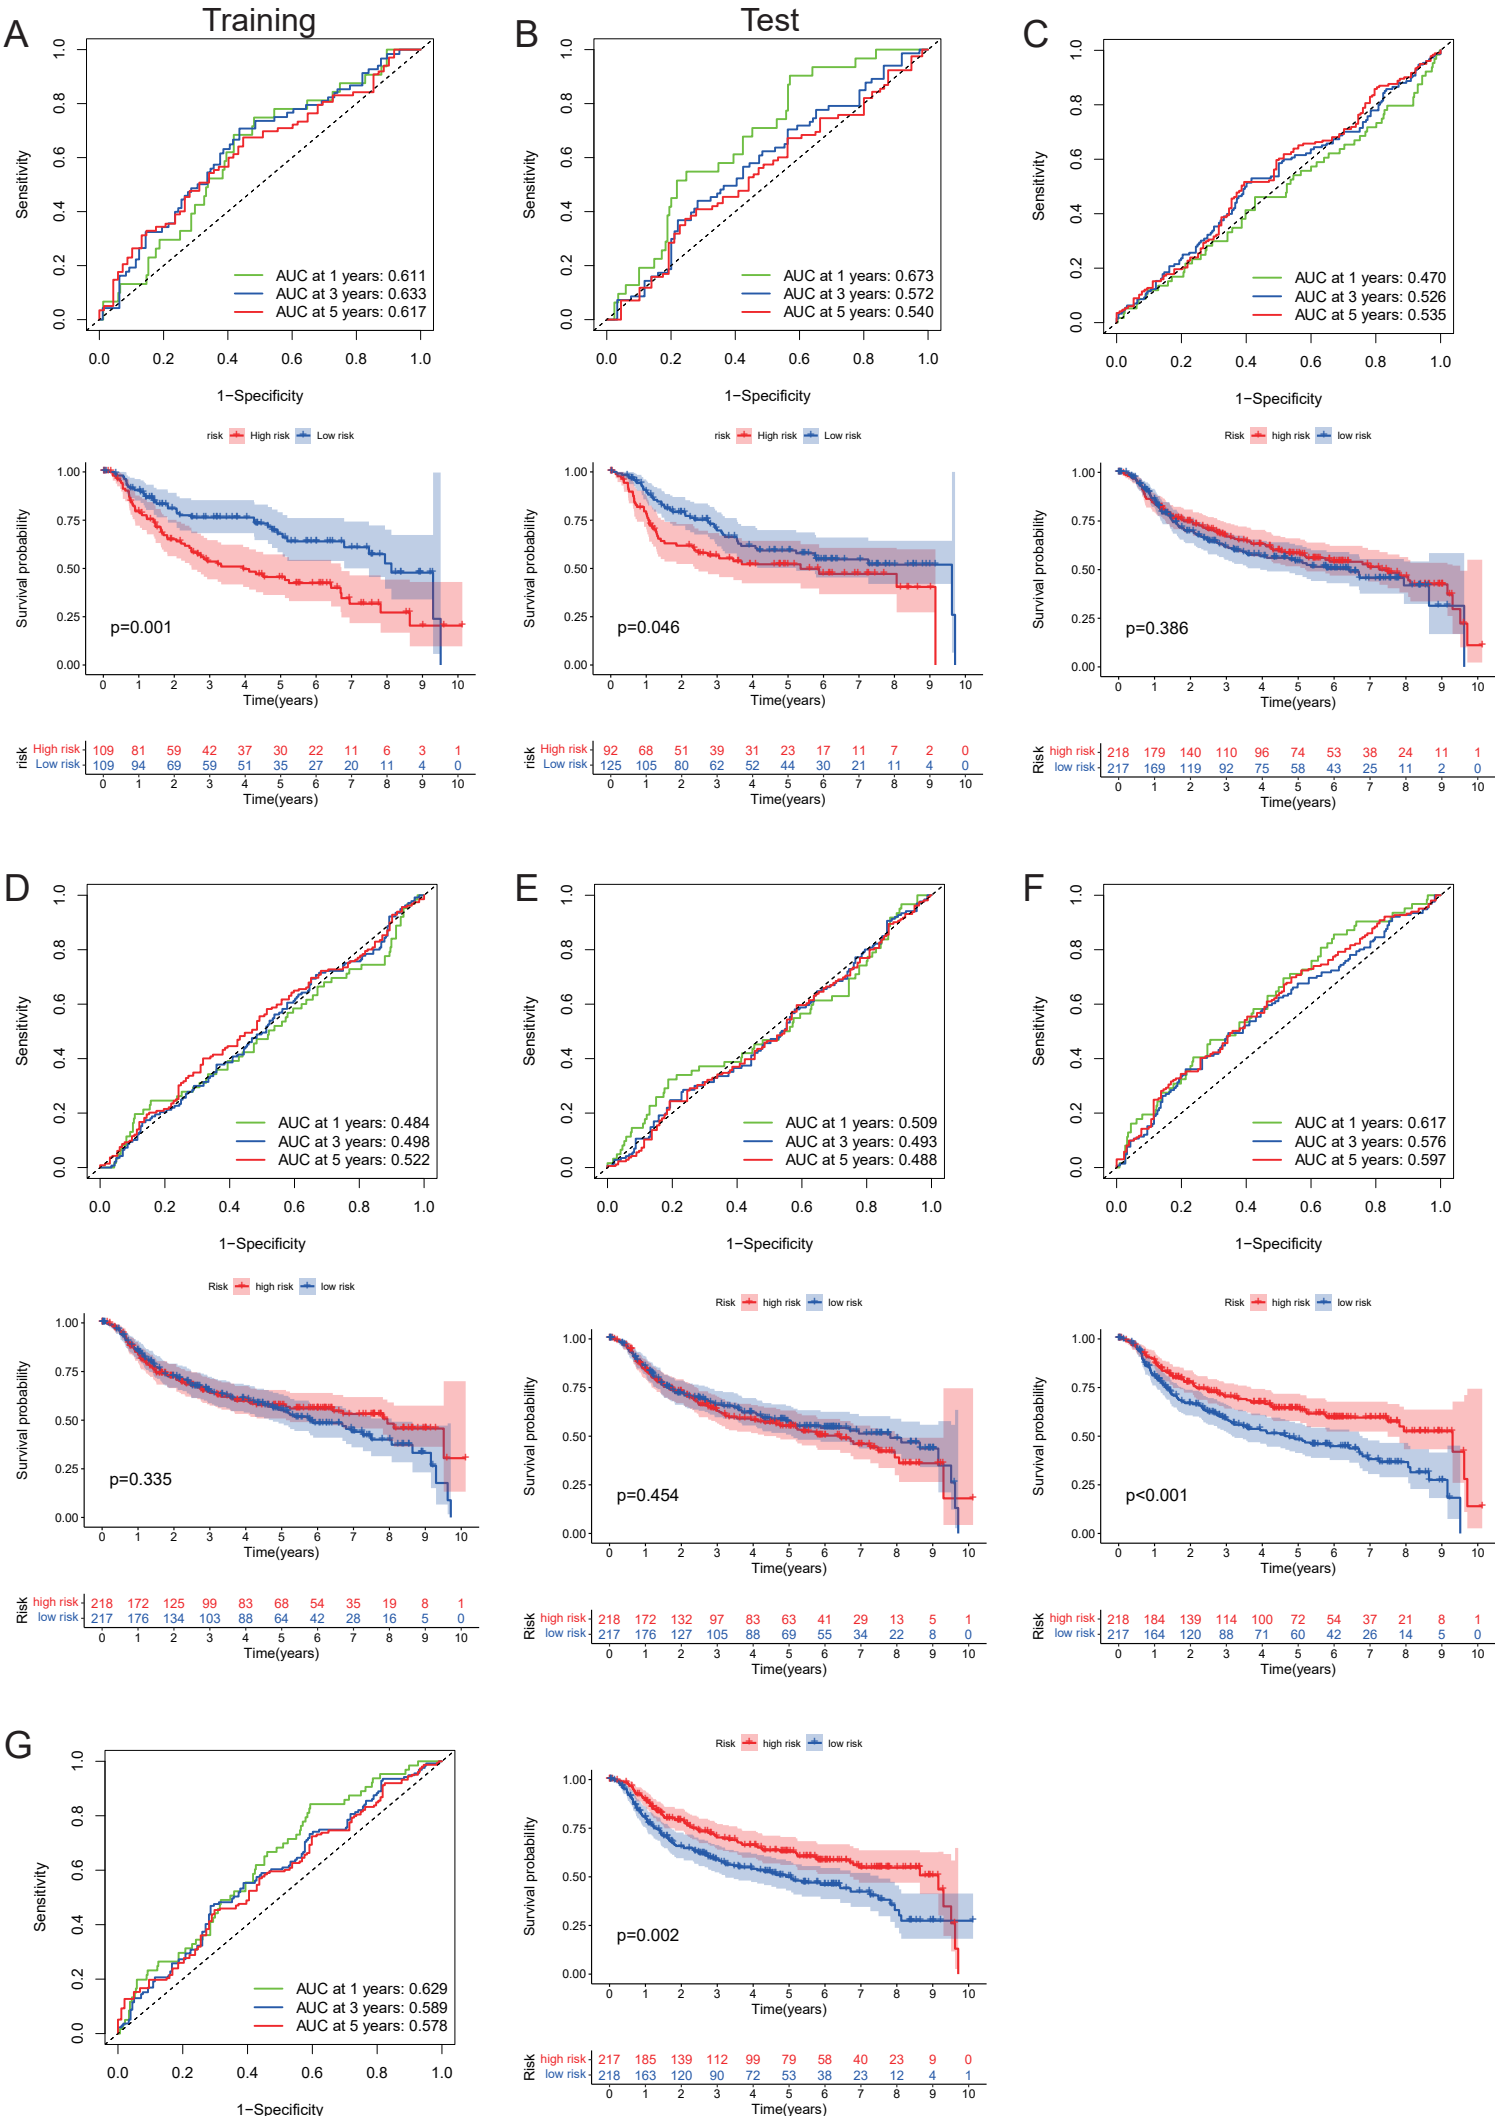

# Supplementary Figure S4

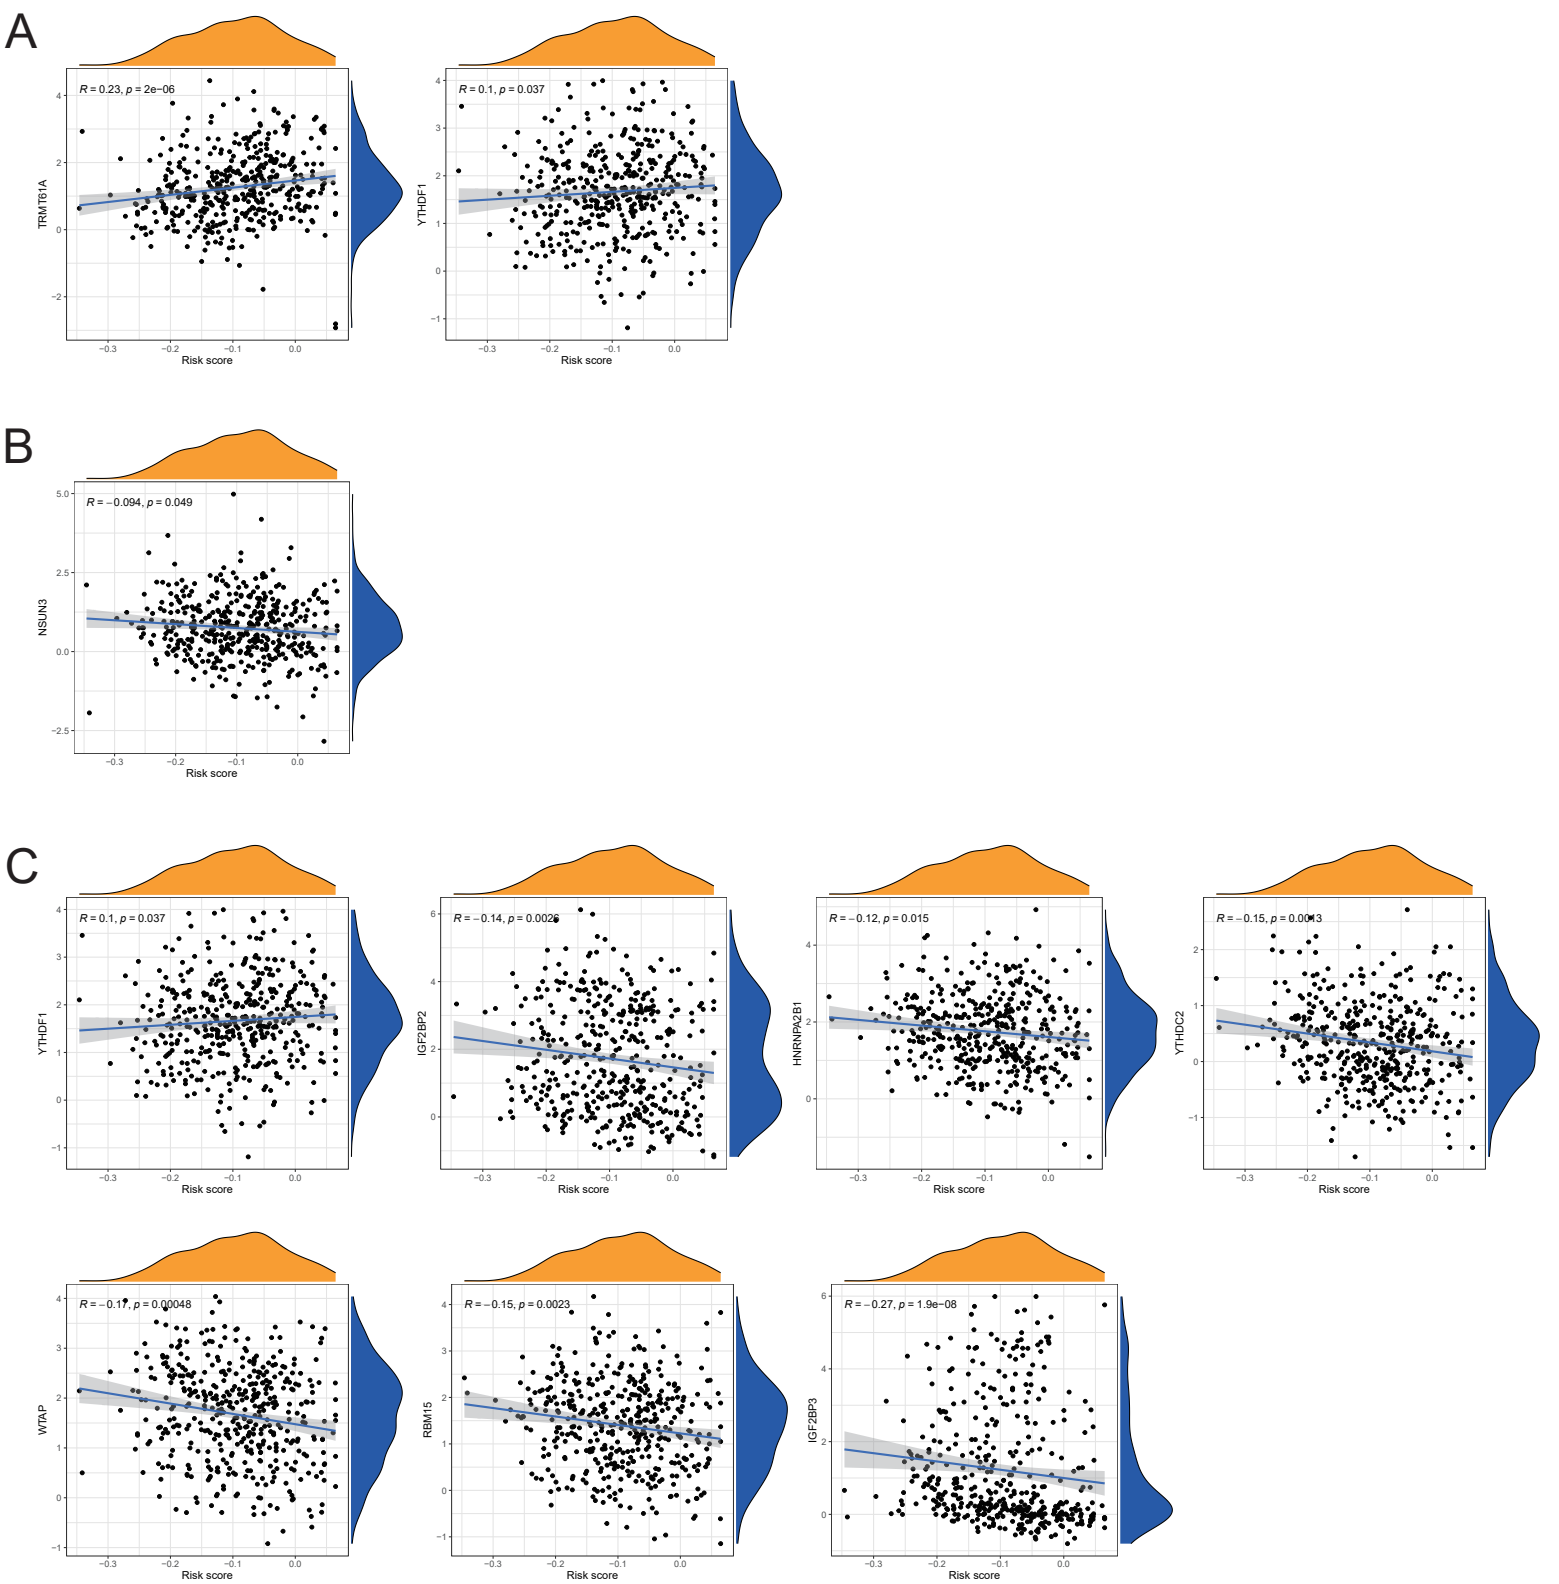

# Supplementary Figure S5

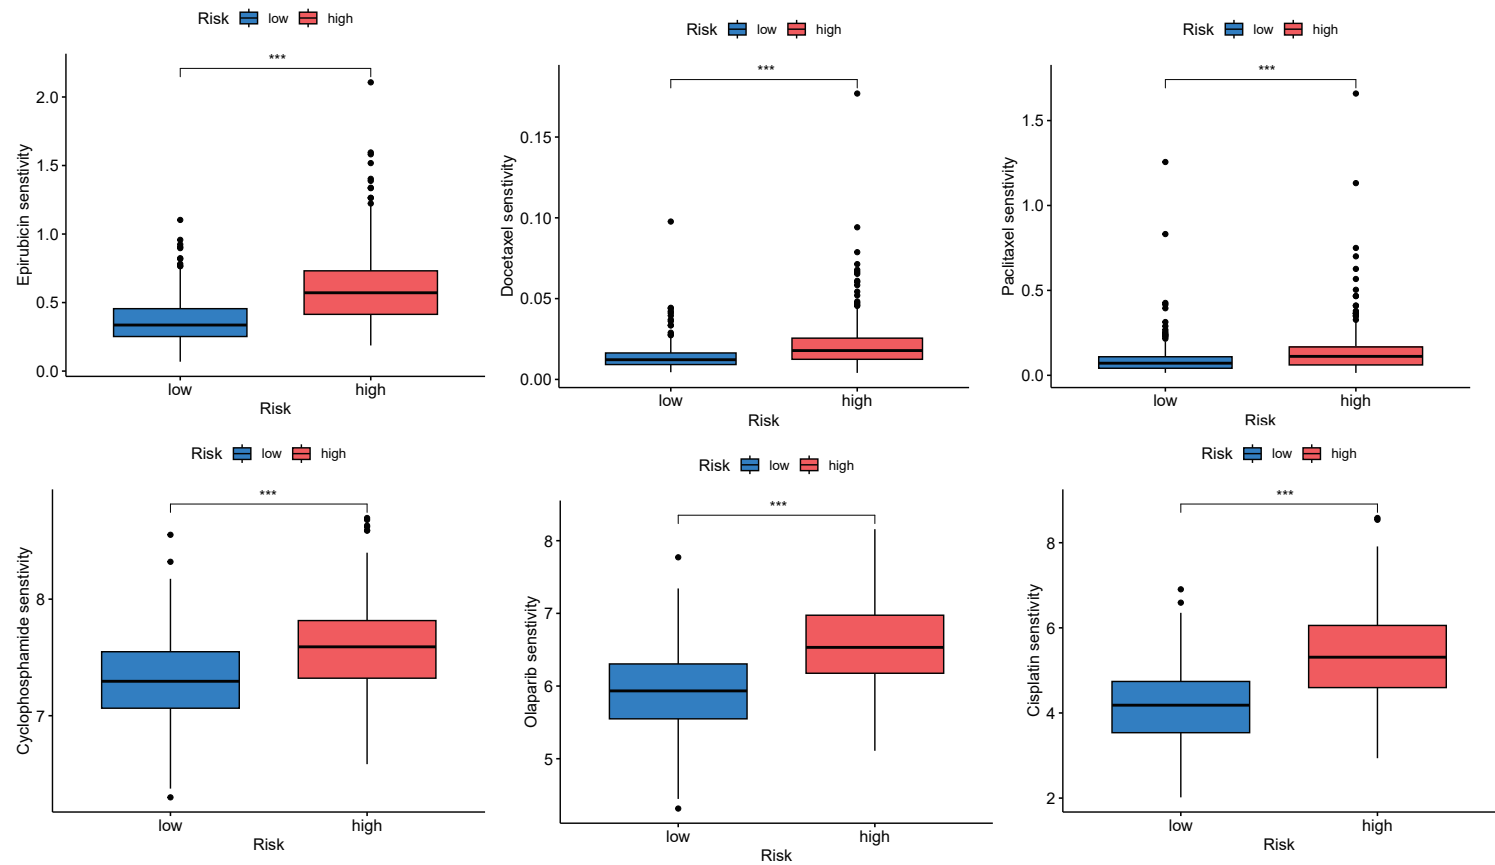

Supplement: s1 [file s1]
