# Supplementary material for: Molecular Characterization and Establishment of a Prognostic Model Based on Primary Immunodeficiency Features in Association with RNA Modifications in Triple-Negative Breast Cancer
Source: Genes (Basel). 2023 Dec 2;14(12):2172. doi: 10.3390/genes14122172 (PMC10743198; doi:10.3390/genes14122172)
Supplement: Supplementary file 1 [file genes-14-02172-s001.zip]

Archive with 4 entries (4 files):
- Supplementary Figure Legends.pdf
- Supplementary Figures_PIDG_Subtypes_TNBC_Characterization_and_Prognostic_Model.pdf
- Supplementary Table S1 Univariate Cox Output.xlsx
- Supplementary Table S2 Comparison of Prognostic Model Performance in TNBC-related Studies.xlsx
