# Supplementary material for: Molecular Characterization and Establishment of a Prognostic Model Based on Primary Immunodeficiency Features in Association with RNA Modifications in Triple-Negative Breast Cancer
Source: Genes (Basel). 2023 Dec 2;14(12):2172. doi: 10.3390/genes14122172 (PMC10743198; doi:10.3390/genes14122172)
Supplement: Supplementary file 1 [file genes-14-02172-s001.zip › Supplementary Table S1 Univariate Cox Output.xlsx]

## Sheet: uniCox
Supplementary Table 1. Univariate Cox Output
Gene	HR	HR.95L	HR.95H	pvalue
TAP1	0.870089	0.77103	0.981874	0.0240341
IRF1	0.849157	0.753037	0.957545	0.0076355
CD2	0.853873	0.75282	0.96849	0.0139646
PSMB9	0.868902	0.763587	0.988743	0.0330321
ICOS	0.860694	0.757169	0.978373	0.02177
HLA-DMB	0.862549	0.763465	0.974492	0.0175494
HLA-DMA	0.85512	0.754055	0.96973	0.0147301
CD7	0.859435	0.756576	0.976278	0.0198539
NLRC5	0.834859	0.734041	0.949523	0.00598177
APOBEC3G	0.843349	0.741143	0.959648	0.00974179
CXCR3	0.876035	0.774343	0.991082	0.0355307
CTLA4	0.818522	0.715673	0.936153	0.00346692
CD48	0.837032	0.733345	0.95538	0.0083775
CD74	0.87678	0.770186	0.998128	0.0467787
HLA-DRA	0.844746	0.74595	0.956627	0.00784417
BTN3A1	0.845774	0.737806	0.969542	0.0162228
UBASH3A	0.871725	0.760678	0.998984	0.0483152
HLA-B	0.852416	0.741554	0.97985	0.024684
CD53	0.86691	0.767033	0.979792	0.0222043
LCP2	0.870014	0.770055	0.982949	0.0253425
PSMB10	0.870573	0.764129	0.991845	0.0372495
IL2RB	0.845348	0.738559	0.967577	0.0147557
APOL3	0.851382	0.754213	0.96107	0.00926345
CD3D	0.842583	0.741122	0.957934	0.00888495
IL10RA	0.871189	0.769623	0.986159	0.0292329
HLA-DPA1	0.853361	0.754656	0.964977	0.0114581
CIITA	0.870413	0.769479	0.984587	0.0273163
SASH3	0.882536	0.782995	0.994731	0.0407081
CYTIP	0.873359	0.764072	0.998276	0.0471157
IL18RAP	0.795967	0.693973	0.912951	0.00110747
ARHGAP30	0.852502	0.748607	0.970816	0.0160997
IL12RB1	0.870016	0.765676	0.988574	0.0326571
CD27	0.866786	0.758821	0.990112	0.0351714
PLEK	0.846291	0.747768	0.957795	0.00822197
GFI1	0.848231	0.74318	0.968132	0.0146844
HLA-DQA1	0.840536	0.744569	0.948873	0.00497878
HLA-F	0.832942	0.735708	0.943026	0.0038991
SAMSN1	0.873906	0.767835	0.99463	0.0411986
STX11	0.851323	0.748584	0.968162	0.0141648
NKG7	0.881087	0.781912	0.992841	0.0377201
CD8A	0.82297	0.720465	0.94006	0.00409558
CD3G	0.859933	0.753656	0.981196	0.0249616
CD247	0.819736	0.711559	0.944359	0.00590865
EVI2B	0.865499	0.763935	0.980564	0.0233204
IL18BP	0.83345	0.720847	0.963643	0.0138918
TAP2	0.828637	0.720973	0.95238	0.00811987
CD6	0.847522	0.739284	0.971608	0.0176379
HCP5	0.83566	0.729333	0.957488	0.00972065
ARHGAP9	0.864587	0.755352	0.98962	0.0347402
SLAMF1	0.878195	0.773322	0.997291	0.0453087
TIFAB	0.84443	0.740385	0.963097	0.0117209
CXCL9	0.864409	0.777281	0.961303	0.00718799
HCLS1	0.826538	0.725881	0.941153	0.0040359
PTPRC	0.858877	0.765252	0.963958	0.00978611
TNFRSF1B	0.856786	0.754751	0.972615	0.0168873
DOCK2	0.875194	0.769937	0.994841	0.0414428
CXCR6	0.822141	0.721425	0.936917	0.00331148
RAC2	0.87982	0.780081	0.992313	0.0370087
PYHIN1	0.836313	0.729636	0.958588	0.0102452
TRAT1	0.839277	0.73489	0.958491	0.00972186
CTSS	0.836592	0.744129	0.940545	0.00282934
CCL5	0.834197	0.736192	0.945248	0.00446908
CD69	0.825906	0.716473	0.952055	0.00835344
GPSM3	0.873163	0.770302	0.989759	0.0339276
BTN3A3	0.832164	0.728964	0.949975	0.00653549
WIPF1	0.829663	0.720547	0.955304	0.0094446
IKZF1	0.856519	0.746159	0.983202	0.0277587
WARS1	0.858527	0.760881	0.968704	0.0132821
PTPN6	0.878842	0.781683	0.988078	0.0307253
IGFLR1	0.867707	0.75768	0.993713	0.0402545
IRF8	0.841591	0.746312	0.949033	0.00490358
THEMIS	0.847949	0.737792	0.974552	0.0201779
CD96	0.84918	0.741254	0.972821	0.0184094
CORO1A	0.859485	0.75633	0.976708	0.0202733
CD226	0.829594	0.711984	0.966631	0.0166178
SLAMF6	0.871886	0.7666	0.991632	0.0368034
SH2D1A	0.826651	0.725745	0.941585	0.00415487
HLA-DOB	0.827559	0.725581	0.943869	0.00478837
DOK3	0.878385	0.776795	0.993262	0.0386619
LY9	0.872961	0.764672	0.996584	0.044368
GZMK	0.841129	0.735139	0.962399	0.0118124
ARHGAP25	0.860744	0.754665	0.981734	0.0254382
BTN3A2	0.839007	0.733861	0.959217	0.0101863
GBP4	0.830772	0.738814	0.934176	0.00195104
TNFAIP8	0.84944	0.7422	0.972174	0.0177979
GIMAP4	0.877499	0.771325	0.998287	0.0470311
SLA	0.874752	0.767335	0.997206	0.0453038
ITK	0.86269	0.756096	0.984313	0.0281679
FYB1	0.838375	0.738085	0.952292	0.00668867
CCR2	0.857671	0.756682	0.972138	0.0163037
ACSL5	0.863001	0.75071	0.992088	0.0382975
GZMB	0.833552	0.738985	0.940221	0.00304424
DEF6	0.838104	0.731081	0.960794	0.011285
PIK3CD	0.869678	0.765027	0.988646	0.0327996
P2RY10	0.865011	0.753369	0.993197	0.0397064
JAML	0.833908	0.729967	0.952649	0.00749188
PLCB2	0.846459	0.737892	0.971	0.0173043
PRKCB	0.833968	0.728072	0.955266	0.00877993
TBC1D10C	0.848891	0.744254	0.968239	0.0146529
IL2RG	0.875732	0.778542	0.985055	0.0270469
ARHGAP15	0.865806	0.755394	0.992355	0.038432
CD52	0.831213	0.736959	0.937522	0.00260732
STAT4	0.797047	0.685187	0.927169	0.00328156
CLECL1	0.827791	0.716575	0.956269	0.0102461
PARVG	0.870289	0.764615	0.990566	0.0354244
CXCL13	0.842801	0.750728	0.946167	0.00376191
CD38	0.866504	0.764718	0.981837	0.0246101
PRF1	0.876807	0.77821	0.987897	0.0307702
TRAF1	0.87678	0.770545	0.997663	0.0459912
IL15RA	0.824478	0.725606	0.936822	0.00306365
LILRB2	0.878126	0.773527	0.99687	0.0446006
FGL2	0.872588	0.768505	0.990768	0.0354587
BIRC3	0.877278	0.779498	0.987323	0.0298891
DOCK10	0.856805	0.756143	0.970868	0.0153671
GBP5	0.845741	0.75568	0.946536	0.00354064
TRIM69	0.793787	0.692244	0.910224	0.000943353
GZMH	0.887742	0.788606	0.999341	0.0487389
GBP2	0.861015	0.761327	0.973755	0.0171452
IGSF6	0.874588	0.772195	0.990558	0.0349198
CD37	0.877977	0.773593	0.996447	0.0438961
ADGRG5	0.873485	0.770211	0.990606	0.0351189
HLA-DOA	0.875172	0.780918	0.980802	0.021826
GPR18	0.870608	0.7629	0.993522	0.0397426
CD40	0.864456	0.761667	0.981118	0.0241268
BTLA	0.866538	0.759373	0.988826	0.0334372
PTPN22	0.860778	0.749452	0.988641	0.0338678
GMFG	0.859423	0.753479	0.980262	0.0240109
PSME2	0.849185	0.744654	0.968389	0.0147179
NAPSB	0.873671	0.774551	0.985475	0.0279411
BTN2A2	0.861547	0.764045	0.971492	0.0150176
APOBEC3F	0.813502	0.710891	0.930925	0.0026959
SELL	0.87038	0.775795	0.976497	0.0180218
LPXN	0.835942	0.729234	0.958264	0.0101167
IFNG	0.882686	0.786999	0.990008	0.0330487
CLEC12A	0.84349	0.74043	0.960894	0.0104691
GIMAP6	0.879863	0.774662	0.999351	0.0488426
P2RY13	0.844335	0.738948	0.964752	0.0128643
TNFAIP3	0.868493	0.755342	0.998594	0.0477349
CYBB	0.880823	0.782958	0.99092	0.0347076
CST7	0.878331	0.773793	0.996992	0.0447966
CTSW	0.877255	0.779164	0.987696	0.0304178
FGR	0.882574	0.780209	0.998369	0.0470429
CDC42SE2	0.860453	0.749582	0.987722	0.0327205
GZMA	0.841815	0.744182	0.952258	0.00618635
TSPAN32	0.854109	0.739714	0.986194	0.0315988
ADAMDEC1	0.885888	0.790563	0.992708	0.0369821
IL2RA	0.877503	0.774375	0.994366	0.0405075
CLEC10A	0.873022	0.773553	0.985282	0.027792
DPEP2	0.882158	0.782702	0.994252	0.0399356
TLR8	0.863602	0.76538	0.974429	0.0172915
CARD16	0.864894	0.754031	0.992056	0.0380864
LTB	0.843867	0.749396	0.950247	0.00507212
FNBP1	0.824522	0.716703	0.948561	0.00696453
IDO1	0.846352	0.766022	0.935107	0.0010432
STAMBPL1	0.812788	0.707088	0.93429	0.00354342
RIPOR2	0.868235	0.758231	0.994198	0.0409389
JAK2	0.86721	0.760651	0.988698	0.0331807
KLRC1	0.8104	0.696948	0.942319	0.00629416
SERPINB9	0.85765	0.755231	0.973958	0.0179508
KLRB1	0.795845	0.688149	0.920394	0.00208277
IL7R	0.867479	0.763979	0.985001	0.0283002
TAPBPL	0.819698	0.721673	0.93104	0.00221684
PRKCQ-AS1	0.858152	0.760796	0.967966	0.0127779
HCST	0.828154	0.716674	0.956975	0.0105838
RUNX3	0.858859	0.751804	0.981158	0.0250905
CD79A	0.890306	0.801007	0.989561	0.0311967
RFTN1	0.856264	0.747724	0.980559	0.0248422
NLRP1	0.866173	0.759972	0.987214	0.031336
RASSF5	0.796218	0.69428	0.913123	0.0011133
PIM2	0.87506	0.774108	0.989178	0.0328476
KLRG1	0.830164	0.719932	0.957274	0.0104463
TRAF3IP3	0.832896	0.727275	0.953856	0.00822257
KBTBD8	0.866613	0.75284	0.997579	0.0461833
CD79B	0.838965	0.730528	0.963498	0.0128989
KIR2DL4	0.869612	0.770496	0.981479	0.0236516
LGALS2	0.827367	0.725775	0.943181	0.00458087
LAMP3	0.843239	0.747074	0.951783	0.00578225
RAB8B	0.858322	0.754614	0.976283	0.0200563
BCL11B	0.863078	0.74982	0.993444	0.0402072
HSD11B1	0.842582	0.742942	0.955585	0.00764179
CRLF3	0.827324	0.714772	0.957598	0.0110638
AIM2	0.885107	0.78522	0.997702	0.0457575
PLAC8	0.859306	0.751845	0.982126	0.0261099
HR: Hazard Ratio HR.95L: Hazard Ratio Lower 95% CI HR.95H: Hazard Ratio Upper 95% CI
