# Supplementary material for: Molecular Characterization and Establishment of a Prognostic Model Based on Primary Immunodeficiency Features in Association with RNA Modifications in Triple-Negative Breast Cancer
Source: Genes (Basel). 2023 Dec 2;14(12):2172. doi: 10.3390/genes14122172 (PMC10743198; doi:10.3390/genes14122172)
Supplement: Supplementary file 1 [file genes-14-02172-s001.zip › Supplementary Table S2 Comparison of Prognostic Model Performance in TNBC-related Studies.xlsx]

## Sheet: Sheet1
Supplementary Table 2 Comparison of Prognostic Model Performance in TNBC-related Studies
	Title	Risk score	1-Year AUC	3-Year AUC	5-Year AUC	K-M Curve (p-value)	Reference	Figure
Our study	Molecular Characterization and Establishment of a Prognostic Model Based on Primary Immunodeficiency Features in Association with RNA Modifications in Triple-Negative Breast Cancer	(-0.0193 × IL18RAP) + (-0.0364 × STX11) + (-0.0106 × IL15RA) + (-0.0187 × RASSF5)	0.64	0.602	0.577	< 0.001	\	Figure 3C, D
1	Prognostic Significance and Tumor Immune Microenvironment Heterogenicity of m5C RNA Methylation Regulators in Triple-Negative Breast Cancer	（-0.5714 × NSUN6） + （0.024 × NSUN2）	0.47	0.526	0.535	0.386	DOI: 10.3389/fcell.2021.657547	Figure S3C
2	Ferroptosis and triple-negative breast cancer: Potential therapeutic targets	(0.361879 × CDKN2A) + (-0.17576 × TF) + (-0.32256 × DPP4) + (0.723853 × LAMP2) + (-0.60588 × ASNS) + (0.622896 × HMGB1) + (0.556995 × ZFP69B) + (-0.91682 × ELAVL1) + (-0.39918 × HELLS) + (0.228499 × CAV1) + (0.229658 × PSAT1) + (0.226121 × SLC7A11)	0.484	0.498	0.522	0.335	DOI: 10.3389/fonc.2022.1017041	Figure S3D
3	Identification of necroptosis-related subtypes and prognosis model in triple negative breast cancer	(0.2668 × TPSG1) + (0.1289 × KRT6A) + (-1.0792 × GPR19) + (0.3827 × EIF4EBP1) + (0.4732 × TLE1) + (-0.6097 × SLC4A7) + (0.2877 × ESPN)	0.509	0.493	0.488	0.454	DOI: 10.3389/fimmu.2022.964118	Figure S3E
4	Development and Verification of a Prognostic Ferroptosis-Related Gene Model in Triple-Negative Breast Cancer	(-0.429 × IFNG) + (-0.372 × GABARAPL1) + (-0.257 × FH) + (-0.258 × BRD4) + (-0.253 × TFAP2C) + (-0.135 × MT1G) + (-0.076 × WIPI1) + (-0.061 × FADS2) + (-0.042 × SLC2A12) + (-0.037 × NRAS) + (0.077 × DUOX1) + (0.141 × HSF1) + (0.319 × CISD1) + (0.433 × SLC1A5) + (0.485 × SLC2A8)	0.617	0.576	0.597	< 0.001	DOI: 10.3389/fonc.2022.896927	Figure S3F
5	Characterization of Exosome-Related Gene Risk Model to Evaluate the Tumor Immune Microenvironment and Predict Prognosis in Triple-Negative Breast Cancer	(0.122 × IVL) + (-0.176 × CXCL13) + (0.072 × AP2S1)	0.629	0.589	0.578	0.002	DOI: 10.3389/fimmu.2021.736030	Figure S3G
